# Supplementary material for: Responses of soil physico-chemical properties to combustion: a space for time substitution study to infer how changes in climate are likely to affect response of topsoil to fires
Source: Copernicus journal article supplement (doi:10.5194/soil-2016-4), 2016-02-01
Supplement: Supplementary file [file soil-2016-4-RC3-supplement.pdf]

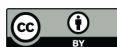

# **Responses of soil physico-chemical properties to combustion: a space for time substitution study to infer how changes in climate are likely to affect response of topsoil to fires**

**Samuel N. Araya<sup>1</sup>, S. Mercer Meding<sup>2</sup> and Asmeret Asefaw Berhe<sup>1,3</sup>**

[1]Environmental Systems Graduate Group, University of California, Merced

[2]Soil, Water, and Environmental Science Dept., University of Arizona, Tucson

[3]Life and Environmental Sciences Unit, University of California, Merced

Corresponding author: S. N. Araya (e-mail: saraya@ucmerced.edu)

## **Abstract**

Fire is a common ecosystem perturbation that affects many soil properties. As global fire regimes continue to change with climate change, we investigated the effect of fire heating temperatures on the physical and chemical properties of soils across a climosequence transect along the Western slope of the Sierra Nevada that spans from 210 to 2865 m.a.s.l. All the soils we studied were formed on a granitic parent material and have significant differences in soil organic matter (SOM) concentration and mineralogy owing to the effects of climate on soil development. The dominant vegetation from lowest to highest elevation across the transect range from oak woodland, oak/mixed-conifer forest, mixed-conifer forest and subalpine mixed-conifer forest. Topsoils (0 - 5 cm depth) from the Sierra Nevada climosequence were heated in a muffle furnace at six set temperatures that cover the range of major fire intensity classes (150, 250, 350, 450, 550 and 650 °C). We determined the effects of fire heating temperature on soil aggregate strength, aggregate size distribution, specific surface area (SSA), mineralogy, pH, cation exchange capacity (CEC), and carbon (C) and nitrogen (N) concentrations. With increase of temperature, we found significant reduction of total C, N and CEC. Aggregate strength also decreased with further implications for loss of C protected inside aggregates. Soil pH and SSA



1 increased with increase in temperature. Most of the statistically significant changes ( $p < 0.05$ )  
 2 occurred at temperature ranges of 350 to 450 °C. We observed relatively smaller changes at  
 3 typical temperature ranges of prescribed fires (i.e. less than 250 °C). This study identifies  
 4 critical combustion temperature thresholds for significant physico-chemical changes in soils  
 5 that developed under different climate regimes, allowing inferences for how soils are likely to  
 6 respond to different fire intensities under anticipated climate change scenarios.

## 7 **Keywords**

8 Chemical properties, Climate change, Climosequence, Fire intensity, Physical properties, Soil  
 9 heating

10

## 11 **1 Introduction**

12 Fire is a common, widespread phenomenon in many ecosystems around the world (Bowman et  
 13 al., 2009). Vegetation fires burn an estimated 300 to 400 million hectares of land globally every  
 14 year (FAO, 2005). In the US alone, over 80,000 fires were reported in 2014—including about  
 15 63,000 ~~wild-land~~ <sup>"wildland" more normal</sup> fires, and 17,000 prescribed burns that burned over 1.5 million and 970,000  
 16 ha of land, respectively (National Interagency Fire Center, 2015). Climate and climatic  
 17 variations exert strong control on <sup>the</sup> distribution, frequency, and severity of fires (Harrison et al.,  
 18 2010). Significant changes <sup>in</sup> on global fire regimes are anticipated because of climate change  
 19 including an increase in frequency of fires in the coming decades (Westerling et al.,  
 20 2006a; Pechony and Shindell, 2010). However, as of yet, we only have limited understanding of  
 21 how changes in fire regimes and climate change are likely to influence response <sup>the of</sup> to  
 22 topsoils in fire affected ecosystems to wild- or prescribed-fires. <sup>"wild or prescribed fires"</sup>

23 Even though humans are responsible for causing a substantial proportion of vegetation fires  
 24 (Caldararo, 2002), vegetation fires are also natural phenomena with an important role in  
 25 maintaining the health of many ecosystems around the world. <sup>Essentially repeats previous sentence. REF needed</sup>  
~~26 across the world depend on fires to maintain ecosystem health and productivity. Many ecosystems in the US and~~  
 27 Nevada, vegetation fires have a major influence on the landscapes (McKelvey et al., 1996).  
 28 Lightning fires were historically common in the dry season in the upland forests of the Sierra



1 Nevada Mountains and also fires were used by some of the Native American tribes to modify  
 2 the environment for their **needs** (Parsons and van Wagtendonk, 1996). *Can you be more specific?*

3 In addition to alteration of ~~the overland~~ vegetation, fire also significantly affects the physical,  
 4 chemical and biological properties of soils. The degree of alteration caused by fires depends on  
 5 fire intensity and duration, which in turn depend on factors such as amount and type of fuels,  
 6 properties of above ground biomass, air temperature and humidity, wind, topography, and soil  
 7 properties of moisture content, texture and **SOM** content (DeBano et al., 1998). The first-order  
 8 effects of fire on soil are caused by the input of heat causing extreme soil temperatures in topsoil  
 9 *Spaces needed where multiple refs listed - correct formatting throughout*  
 10 (Badia and Marti, 2003; Neary et al., 1999) resulting in loss and transformation of SOM, changes  
 11 in soil hydrophobicity, changes in soil aggregation, loss of soil mass, and addition of charred  
 12 material and other combustion products (Albalasmeh et al., 2013; Rein et al., 2008; Mataix-  
 13 Solera et al., 2011). Soil temperature thresholds for some important soil transformations are  
 14 illustrated in Figure 1.

15 Fires also impact soil by altering and removing above-ground vegetation and topsoil biomass,  
 16 and increasing soil erodibility (Carroll et al., 2007; DeBano, 1991), subsequently leading to a  
 17 shift in plant and microbial populations (Janzen and Tobin-Janzen, 2008). Fires with longer  
 18 durations are typically expected to have more impact on soil physical and chemical properties,  
 19 and loss of SOM than **fast-moving, high temperature fires** (González-Pérez et al., 2004). *Slightly conflating temperature and RoS here, latter probably most important*

20 The aim of this study is to investigate effects of combustion temperatures on important soil  
 21 properties. Here we aim to determine how the same input of energy from fires affects topsoils  
 22 that vary significantly based on carbon content, mineralogy, and associated soil physical and  
 23 chemical properties ~~respond to combustion~~. The inferences derived from this work are essential  
 24 for determining how changing climate regimes (and associated changes in vegetation dynamics  
 25 and soil properties) are likely to influence the response of topsoil to wild- and prescribed-fires.  
 26 We use a laboratory heating experiment on soils from a well-characterized climosequence in  
 27 the western Sierra Nevada mountain range ~~in our study~~ to determine: (1) magnitudes of change  
 28 in soil physico-chemical properties associated with different fire heating temperatures; (2)  
 29 identify critical thresholds for major changes in soil-physico-chemical properties for soils that  
 30 significantly vary based on organic matter properties, texture, mineralogy, and other properties.;  
 and (3) infer the implications of changing climate on topsoil physico-chemical properties that

*I like what the study is trying to do but at this point am rather skeptical of the climate angle. It seems to be more of a study of the effects of variation in simulated fire severity (~duration of heating of soil). Fire severity may change with a changing climate but also varies hugely between fires - the inference might be how varying fire severity (~ fire weather and fuel structure) would effect soils but it's something of a leap to go from this to climate change as there are likely to be complex interacting processes involved. To infer a climate effect you're at least two steps removed from the process you're studying (climate ~ fire weather ~ fire severity/behavior ~ soil chemico/physico/biological changes*



1 might experience changing fire regime. This study aims to contribute to the systematic  
 2 evaluation and development of ability to predict the effect of different intensity fires on soil  
 3 properties under changing climate scenarios.

## 4 **2 Materials and methods**

### 5 **2.1 Study site and soil description**

~~This repeats information presented earlier, can be cut.~~  
 6 ~~The Sierra Nevada ecosystems are fire-adapted systems. Fires are common perturbations that~~  
 7 ~~maintain ecosystem health and plant productivity in the region. However, over the last couple~~  
 8 ~~of decades, the frequency and severity of fires has been increasing due to changes in climate~~  
 9 ~~(Westerling et al., 2006b).~~ For this study, we collected soils from five sites across elevation  
 10 transect along the western slope of central Sierra Nevada (Figure 2); the sites were previously  
 11 characterized by Dahlgren et al. (1997). We selected four forested sites that are likely to  
 12 experience forest fires and a fifth lower elevation grassland site for comparison.

13 All the sites have a Mediterranean climate characterized by warm to hot dry summers and cool  
 14 to cold wet winters. Mean annual air temperature ranges from 16.7 °C at the lowest site located  
 15 at 210 m to 3.9 °C at the highest elevation site which is at an elevation of 2865 m. Annual  
 16 precipitation ranges from 33 cm at the lowest site to 127 cm at the highest site (Dahlgren et al.,  
 17 1997; Rasmussen et al., 2007) (Table 1).

18 Soils from the lowest elevation site, Vista soils (210 m), fall within the oak woodland zone  
 19 (elevations < 1008 m). This is the only soil in our study that does not have an O-horizon, the  
 20 soil has dense annual grass, however, and the A-horizon SOM originates mainly from root  
 21 turnover. Musick soils (1384 m) lie within oak/mixed-conifer forest (1008—1580 m) and  
 22 mixed-conifer forest (1580—2626 m). These soils receive the highest biomass and litter fall.  
 23 Shaver and Sirretta soils (2317m) fall within the mixed-conifer forest range zone while Chiquito  
 24 soils (2865 m) lies within the subalpine mixed-conifer forest range (2626—3200 m). These  
 25 soils have lower biomass and litter fall compared to the lower elevation soils. (van Wagtenonk  
 26 and Fites-Kaufman, 2006).

27 The western slope of central Sierra Nevada presents a remarkable climosequence of soils that  
 28 developed under similar parent material and are located in landscapes of similar age, relief,  
 29 slope and aspect (Trumbore et al., 1996) formed on a granitic parent material with significant

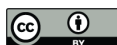

1 developmental differences attributed to climate. The soils at mid-elevation range (1000 to 2000  
 2 m) tend to be highly weathered while soils at high and low elevations are relatively less  
 3 developed (Jenny et al., 1949;Huntington, 1954;Harradine and Jenny, 1958;Dahlgren et al.,  
 4 1997). Among the most important changes in soil properties along the climosequence include  
 5 changes in soil organic carbon (SOC) concentration, base saturation, and mineral desilication  
 6 and hydroxyl-Al interlayering of 2:1 layer silicates. Soil pH and the concentrations of clay and  
 7 secondary iron oxides show a step change at the elevation of present-day average effective  
 8 winter snowline, i.e. 1600 m elevation (Tables 1 and 2) (California Department of Water  
 9 Resources, 1952-1962;Dahlgren et al., 1997).

## 10 2.2 Experimental design and sample collection

11 To investigate the effect of combustion temperature on physico-chemical properties of soils  
 12 with significantly different carbon contents, mineralogy, and overall development, we collected  
 13 top soils (0 to 5 cm depth) from five sites. Triplicate samples, approximately 10 m apart, were  
 14 collected from each site. The soils were air-dried at room temperature and passed through 2 mm  
 15 sieve. Prior to furnace heating, the soils were oven dried at 60 °C overnight. Soil bulk density  
 16 and field soil moisture were determined from separate undisturbed core samples collected from  
 17 each site (Table 2).  
 18 Sub-samples from each soil were heated in muffle furnace to one of six selected maximum  
 19 temperatures (150, 250, 350, 450, 550 and 650 °C). To ensure uniform soil heating and reduce  
 20 formation of heating gradient inside, the soils were packed 1 cm high in a 7 cm diameter  
 21 porcelain flat capsule crucibles. Furnace temperature was ramped a rate of 3 °C min<sup>-1</sup> and soils  
 22 were exposed to the maximum temperature for 30 minutes. Once cooled to touch, soils were  
 23 stored in in air-tight polyethylene bags prior to analysis.

24 The six heating temperatures were selected to correspond with fire intensity categories that are  
 25 based on maximum surface temperature (Janzen and Tobin-Janzen, 2008;DeBano et al.,  
 26 1977;Neary et al., 1999), that is, low intensity (150 and 250 °C), medium intensity (350 and  
 27 450 °C), and high intensity (550 and 650 °C). These fire intensity classes generally correspond  
 28 with thresholds for important thermal reactions in soils observed by differential thermal  
 29 analyses (Giovannini et al., 1988;Varela et al., 2010;Soto et al., 1991) The relatively slow



### Compare to heating rates seen in real fires?

1 heating rate of 3 °C min<sup>-1</sup> is recommended for laboratory based fire simulation experiments Presumably this occurs  
 2 (Giovannini et al., 1988;Terefe et al., 2008;Varela et al., 2010) to prevent sudden combustion as material is oven dry,  
 3 when soil's ignition temperature is reached at about 220 °C (Fernández et al., 1997, 2001;Varela use oven dry material?  
 4 et al., 2010). The identical treatment of all soils, then allows for comparison of how the soils  
 5 from the different climate regimes are likely to respond to fires. Furthermore, once the set  
 6 temperature is reached, samples were exposed to that temperatures for a period of 30 minutes.  
 7 This is approximately equivalent to the time it takes to burn off small dry logs (Stoof et al.,  
 8 2010;Chandler et al., 1983) and 30 to 40 minutes has become the standard in laboratory soil  
 9 heating experiments (for example Varela et al., 2010;Giovannini, 1994;Fernández et al.,  
 10 2001;Zavala et al., 2010). Again, I would have preferred to see some study of the effects of heating duration.  
 30-40 minutes is a long time for a fire to be resident at a site. I warrant that it might  
 approximate conditions under a smouldering log but then to what extent are you  
 actually simulating changes more generally associated with a fire - logs occupy a  
 small proportion of the soil surface.

### 2.3 Laboratory analysis

12 Soil color was measured using the Munsell Color Charts. Dry color was measured from air-  
 13 dried samples and moisture was added to same sample for moist color measurement. Dry-  
 14 aggregate size distribution was measured by sieving. Samples were dry sieved into three  
 15 aggregate size classes: 2–0.25 mm (macro-aggregates), 0.25–0.053 mm (micro-aggregates) and  
 16 <0.053 mm (silt and clay sized particles). These aggregate size classes were selected to enable  
 17 comparison with other studies that investigated the effect of different natural and anthropogenic  
 18 properties on soil aggregate dynamics and aggregate protected organic matter (Six et al 2000).

19 Water-stable aggregate percent was measured by wet-sieving methods of Nimmo and Perkins  
 20 (2002) using a wet-sieving apparatus (Eijkelpamp Agrisearch Equipment, Giesbeek, The  
 21 Netherlands) with 0.25mm mesh size. Four grams of soil is weighed into sieve and slowly pre-  
 22 wetted by capillary rise. Sample was then wet-sieved with an up-down motion with a vertical  
 23 distance of 1.3 cm and a rate of 35 cycles per minute. Soil passing through sieves was collected  
 24 in the cans and weighed after evaporating the supernatant water in oven ( $M_1$ ). The samples  
 25 remaining in the sieve were then subjected to a second round of wet-sieving using another set  
 26 of cans filled with dispersing solution (2 gL<sup>-1</sup> of sodium hexametaphosphate for the soils with  
 27 pH >7 and 2 gL<sup>-1</sup> NaOH for the soils with pH <7). Samples were wet-sieved until all particles  
 28 smaller than the screen opening pass. Mass of soil collected in the second set of cans ( $M_2$ ) was  
 29 determined by evaporating supernatant solution in oven and subtracting the weight of the  
 30 dispersing-agent. The water-stable aggregate fraction was calculated as:



$$1 \quad WSA = \frac{M_2}{M_1 + M_2} \times 100\%.$$

2 Specific surface area was measured using automated N<sub>2</sub>-BET analyzer (Micromeritics Tri-Star  
3 3000, Micromeritics Instrument Corporation, Norcross, GA, USA). For this procedure,  
4 approximately 1 g of soil ~~samples were~~ <sup>was</sup> oven dried at 60 °C for 36 <sup>minutes/hours?</sup> and out-gassed for another  
5 30 minutes using a flow of N<sub>2</sub> gas with outgassing station mantle set to a temperature of 105  
6 °C. Measurement was done using ultra-high purity N<sub>2</sub> gas and the instrument was set to seven  
7 point measurement. The isotherm is analyzed using Micromeritics software.

8 Soil mineralogy was measured from X-ray diffraction analysis (XRD) using PANalytical Xpert  
9 Pro diffractometer (PANalytical Inc., Westborough, MA, USA). We used the PANalytical  
10 Xpert Pro software for identification of mineral phases and Rietveld refinement for  
11 quantification (Schulze and Dixon, 2002; Rietveld, 1969). Soil samples were ground to fine  
12 powder consistency using ball-mill (8000M MiXer/Mill, with 65 ml stainless steel grinding vial  
13 set, SPEX SamplePrep, LLC, Metuchen, NJ, USA) and oven dried at 60 °C for over 36 hours.  
14 Samples were scanned at generator setting of 45 mA by 40 kV. Scan start position was set to 5°  
15 2θ and end position was set to 120 2θ. Scan step time was set to 10 seconds at step interval size  
16 of 0.0170° 2θ. **Two or three replicate measurements** were run for each sample and samples were  
17 measured in random order. <sup>Why not consistent?</sup>

18 Soil pH was measured <sup>using</sup> 1:2 solid:solution ratio mixtures in a deionized water and 0.01 M CaCl<sub>2</sub>  
19 solution. Five grams of soil was mixed by shaking with 10 ml of solution and allowed to stand  
20 for 30 minutes with stirring every 10 minutes. The pH reading was taken by placing electrodes  
21 directly in the sediment slurry immediately after stirring (Thomas, 1996).

22 Cation exchange capacity (CEC) was measured by the barium exchange method. Barium was  
23 used to quantitatively displace soil exchangeable cations, and excess barium was removed by  
24 four deionized water rinses. A known quantity of calcium is then exchanged for barium and  
25 excess solution calcium is measured in order to determine CEC by the difference in the quantity  
26 of the calcium added and the amount left in the resulting solution. The method has a detection  
27 limit of 2.0 cmol/kg (Rible and Quick, 1960).

28 Elemental concentrations of carbon (C) and nitrogen (N) were measured using an elemental  
29 combustion system (Costech ECS 4010 CHNSO Analyzer, Costech Analytical Technologies,



1 Valencia, CA, USA) that is interfaced with a mass spectrometer (DELTA V Plus Isotope Ratio  
 2 Mass Spectrometer, Thermo Fisher Scientific, Inc, Waltham, MA, USA). For the analyses, air-  
 3 dried < 2 mm soil samples were ground to powder consistency on a ball-mill (8000M  
 4 MiXer/Mill, with a 55 ml tungsten Carbide Vial, SPEX SamplePrep, LLC, Metuchen, NJ, USA)  
 5 and oven dried at 60 °C for over 36 hours. The values for C and N concentration were corrected  
 6 for oven dried weights by oven-drying subsamples at 105 °C.

7 *Statistical Analysis* There's no need to engage in "sacrificial pseudoreplication" and average values for the  
 cores. Why not fit a mixed effects model with core as a random effect?

8 All quantitative results are expressed as means of three replicates  $\pm$  standard error, unless  
 9 otherwise indicated. Differences of means were tested by Analysis of Variance (ANOVA) and  
 10 pairwise comparison of treatments done using Tukey's HSD test at  $p < 0.05$  significance level.  
 11 The ordinary linear regression technique was used to examine relationships between soil  
 12 properties. All statistical analysis were performed using R statistical software ([r-project.org](http://r-project.org)).

### 13 3 Results

Not the correct citation for R. Need to  
 state what functions were used for the  
 analyses

#### 14 3.1 Soil color

15 We observed a marked soil color change, as inferred using the Munsell color system, with  
 16 increasing heating temperature (Figure 3). With increase in heating temperature, all the soils  
 17 exhibited a similar trend in color change. As the heating temperatures increased, the soils  
 18 initially got darker ~~with~~, reaching their darkest color in mid temperatures (250 - 350 °C when  
 19 dry and 250 - 450 °C when moist). At higher temperatures, the soils became markedly lighter  
 20 and became increasingly reddish in color (with hue changing from 10YR to 7.5YR at  
 21 temperatures above 550 °C). Color change patterns were similar for dry and for moist soils  
 22 except for the marked color change occurring at 450 °C in dry soils and at 550 °C in moist soils.  
 23 Across the heating temperature range, Vista (210m) soils showed the least pronounced increase  
 24 in darkness at 350°C while Shaver (1737m) soils showed the most pronounced darkening at that  
 25 temperature range (from dry color of 10YR 5/2 unburned to 10YR 3/3 by 350°C). At higher  
 26 temperatures, Musick soils (1384m) showed the largest change in dry soil color going from  
 27 10YR 2/2 at 350 °C to 7.5YR 6/6 at 650 °C.





### 3.2 Mass loss

Mass loss was proportional to heating temperature in all the soils. For the high and low elevation soils, statistically significant mass loss, compared to unburned soils, was observed above 350°C. In contrast, significant mass loss was observed for the two mid elevation soils of Musick (1384m) and Shaver (1737m) starting 250°C. There was no significant mass loss at temperatures above 450°C for all soils. For all our soils, the steepest mass loss was observed between temperatures of 250 and 450 °C (Figure 4). Vista (210m) soils showed the lowest mass loss with heating while Musick soils (1384 m) showed the highest mass loss with heating.

Results of the ANOVA (or mixed effects model) need to be reported in full (i.e. d.f., F and P values)

### 3.3 Aggregate stability and size distribution

Aggregate stability generally decreased with temperature for all soils. While aggregate stability seemed to decrease in an almost uniform manner with increase in temperature for the lower to mid elevation soils, the higher elevation Sirretta (2317m) and Chiquito (2865m) soils showed a stepwise decrease in aggregate stability at 250 °C and 350 °C respectively. At higher temperature heating aggregate stability for the two soils showed only a small decrease from these two temperatures. Statistically significant decrease in aggregate strength, compared to unburned samples, was observed only at higher temperatures above 350 °C for Sirretta (2317m) and Chiquito (2864m) soils, and above 450 °C for Musick (1384m), Vista (210m) and Shaver (1737m) soils (Figure 4).

Please report results of stats in full

Although not statistically significant, all soils showed a decrease in macro-aggregate fraction accompanied by increase in micro-aggregate and silt-clay sized fractions (Figure 5). For the two lower elevation soils (Vista and Musick) the decrease in macro-aggregate fraction was over 10% and less than 5% for all the other soils. Only Musick (1384m) soils showed a statistically significant decrease in macro-aggregate fraction between 150 and 350 °C temperatures.

Please report all stats in full

### 3.4 Specific surface area

For all soils, we observed a stepwise increase in specific surface area (SSA) for samples were heated to between 250 to 450 °C (Figure 4). Changes in SSA between soils heated below 250 °C and those heated above 450 °C were statistically significant at  $p < 0.05$  for all soils, except the high elevation soils Sirretta (2317 m) and Chiquito (2865 m). Sirretta soils showed a lot of

Please report stats in full

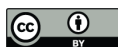

1 variability and did not show any significant change in SSA throughout the temperature range  
2 while the Chiquito soil showed statistically significant increase between low temperature 150 –  
3 250 °C and higher temperature 350 – 550 °C range. The pattern of change in SSA with  
4 temperature was similar for all soils. The lowest SSA was recorded for all soils when soils were  
5 heated at 250 °C, and highest SSA was observed at 350 °C (for Musick and Chiquito soils) or  
6 450 °C (Vista and Shaver soils).

### 7 **3.5 Soil mineralogy**

8 The bulk soil XRD results of changes in soil mineralogy in response to heating are presented  
9 for basic mineral groups as: feldspar (microcline and orthoclase); plagioclase (albite and  
10 oligoclase); amphibole; mica/illite (biotite); kaolinite; gibbsite; and expandable phyllosilicate  
11 (montmorillonite and vermiculite). We identified vermiculite with low confidence, since we did  
12 not correct with oriented clay treatments, hence it is not certain if the identified peaks are indeed  
13 representative of vermiculite, chlorite, or both. The XRD diagrams showed some significant  
14 transformations in soil mineralogy with heating, with shifted peaks at higher temperatures  
15 suggesting transformation of clay minerals. Layer silicates appeared to collapse structurally,  
16 possibly due to dehydration and the removal –OH (Figure 6). Summary mineral composition  
17 changes identified from XRD analysis using Rietveld method are presented in Figure 7. Across  
18 all the soils, the largest mineral composition change with increased heating temperatures were  
19 observed for kaolinite that experiences loss at temperatures above 550°C. Gibbsite was not  
20 found in soils that it was originally present after 450°C. Furthermore, mica/illite, plagioclases  
21 and amphibole mineral groups changed consistently with increasing temperature. The largest  
22 change in soil mineralogy with heating was observed for the mid-elevation Music (1384m) and  
23 Shaver (1737m) soils that are also among the most developed soils with highest proportions of  
24 the 1:1 clay minerals (kaolinite).

### 25 **3.6 Soil pH**

26 With increase in temperature, all soils showed a similar pattern of increase in pH (Figure 8).  
27 For all soils the largest increase in pH (2.5 – 5 units) occurred between 250 and 450 °C. All the  
28 soils started out with slightly to moderately acidic pH and with the exception of Chiquito (2865)  
29 soils all soils became alkaline at temperatures above 450 °C. The largest increase in pH was



1 observed for the Musick (1384 m) soils which reached a pH of 10 at temperatures above 550  
 2 °C.

### 3 **3.7 Cation exchange capacity**

4 The CEC of our soils ranged from an average of 6 cmol<sub>c</sub>/kg for Chiquito (2865 m) soils to 25  
 5 cmol<sub>c</sub>/kg for Musick (1384 m) soils. With increase of heating temperature all soils showed  
 6 continued decrease of CEC. With the exception of Musick (1384m) soils, CEC eventually  
 7 dropped to below our detection limit (2 cmol<sub>c</sub>/kg) at temperature above 550 °C (Figure 8). For  
 8 the poorly weathered Chiquito (2865 m) soils, CEC was below 2 cmol<sub>c</sub>/kg at temperatures 250  
 9 °C and above. For the rest of the soils, statistically significant changes in CEC (p<0.05) occurred  
 10 at 450 °C with the exception of Musick (1384 m) soils which showed statistically significant  
 11 drop at 250 °C and again 350 °C. At 350 °C, all the soils except Musick (1384 m) showed a  
 12 slightly higher CEC than at 250 °C thus interrupting continuous pattern of CEC decrease with  
 13 increase in temperature.

### 14 **3.8 Carbon and nitrogen concentration**

15 The initial concentration of C range<sup>d</sup> from less than 2% (for the Vista soil, 210 m) to over 7 %  
 16 (for the Musick soils, 1384 m). Soil C concentration decreased with increase in temperature  
 17 (Figure 9) with the largest decrease occurring between temperatures of 250 and 450 °C. At 450  
 18 °C, all soils lost more than 95% of their initial C and changes at higher temperatures were small  
 19 and statistically insignificant (p<0.05). Soil's C:N ratio ranged from 10 (Vista soils, 210 m) to  
 20 29 (Musick soils, 1384 m). For all soils C:N ratio decreased with increase in heating temperature  
 21 in a similar pattern as what we observed for the changes in C concentration (Figure 9).

22 The loss of C and N from soils due to heating showed a similar response among all five soils.  
 23 After 250 °C, all the soils lost more than 25% of their initial C (except Shaver soils that lost  
 24 only about 10%). At 350 °C all soils lost 50 to 70% of C. Combustion at 450 °C led to loss of  
 25 more than 95% of their initial C for all soils in this study. Loss of N was lower than that of C.  
 26 At temperatures greater than 550 °C there was 5 to 15% of soil N still remaining. Consequently,  
 27 we observed a decrease of C:N ratio with increase in heating temperature. All soils continued  
 28 to lose about 15% soil N for every 100 °C increase and maintained more than 60% of their N at

Report stats in full  
 please



1 heating temperatures up to 350 °C. After heating at 450 °C, all soils lost more than 60% of the  
 2 initial soil N and 85% by 550 °C.

#### 3 **4 Discussion**

4 **The** Topsoil layer is most affected by extreme temperature<sup>s</sup> during vegetation fires. Our results show  
 5 significant changes in soil properties as a result of temperature exposure. Our findings  
 6 demonstrate that alterations and loss of SOM in topsoil, rather than alterations to soil minerals,  
 7 was the most important driver for the observed changes in soil physico-chemical properties after  
 8 combustion. Our XRD analysis shows notable changes in soil mineralogy only after the soils  
 9 were heated to about 450 to 550 °C (Figure 7). In upland ecosystems, such as the Sierra Nevada  
 10 Mountains, the soils typically have low clay content and low concentration of secondary  
 11 minerals (Neary et al., 1999; Ubeda and Outeiro, 2009). In addition, these upland temperate  
 12 ecosystems also tend to have relatively high concentration of SOM, including a fairly well  
 13 developed O-horizon. Consequently, strong relationships are observed between SOM  
 14 concentrations and the soils' physical and chemical properties. **Simple linear regression**  
 15 **analyses between C concentration changes and other soil physical and chemical changes for our**  
 16 **study soils shows that more than 80% of the variability in mass loss, aggregate strength, SSA,**  
 17 **pH, CEC and N concentrations are associated with changes in C concentration at the different**  
 18 **heating temperatures. Table 3 summarizes the correlation coefficients of soil property changes**  
 19 **with changes in C concentration.**

Don't introduce new statistical analyses in the Discussion. All results and analyses should be presented in the Results. The results of the regressions need to be reported in full. I'm not sure you need to do an ANOVA and regression - what does the extra analysis tell you? Correlation analysis was not mentioned in the Methods or Results

20 The changes in soil color observed were consistent with the charring of SOM which leads to  
 21 darkening of the brownish color of the soils. At temperatures over 450 °C, the near complete  
 22 removal of SOM by combustion and the addition of ash products likely explains the observed  
 23 lighter color of soils. The increase in Munsell chromas and reddening of soils at these high  
 24 temperatures has been noted in previous works (e.g. (Giovannini et al., 1988; Ulery and Graham,  
 25 1993; Ketterings and Bigham, 2000) and is likely a result to oxidation and transformation of  
 26 iron oxides in a manner analogous to aging of soils and transformations of mineral soil after  
 27 intense weathering.

28 The extent of mass loss in top soil layers due to vegetation fires is strongly correlated to SOM  
 29 combustion (Rein et al., 2008). In all of our soils, statistically significant mass loss ( $p < 0.05$ )  
 30 occurred within the temperature ranges of SOM combustion. Proportion of soil mass loss with



1 temperature was proportional to initial C concentration of the soils, Musick (1384m) soils,  
2 which had the highest initial C concentration (7%) had the steepest soil mass loss and lost 15%  
3 of mass at 550°C while Vista (210m) which had less than 2% C concentration showed the  
4 smallest mass loss losing less than 5% mass at even at the highest temperature. The influence  
5 of other mass loss mechanisms likely account for mass loss outside of the temperature range  
6 where SOM plays a dominant role, dehydration processes are most likely responsible for mass  
7 loss at temperatures below 250°C where the loss and transformation of SOM is minimal. Mass  
8 loss at higher temperatures where most of SOM has been combusted (i.e. >450°C) is likely  
9 dominated by charring, ashing and volatilization processes.

10 Most studies report significant soil aggregate stability reduction with fire heating (e.g. Zavala  
11 et al. (2010); Arcenegui et al. (2008)), however, contrasting findings are also reported in other  
12 studies. Mataix-Solera et al. (2011) explains that increase in aggregate strength with heating is  
13 possible in clay-rich soils where main cementing agents are inorganic minerals such as calcium  
14 carbonates and metallic oxides which would fuse under fire heating increasing aggregate  
15 stability. Another possibility is, soils which initially had weak hydrophobicity may show  
16 increased aggregate stability due to increase in hydrophobicity, in such cases however aggregate  
17 strength would decline at higher severity fires as hydrophobicity is destroyed.

18 Aggregate stability in all our soils generally decreased with increase in heating temperature.  
19 Although we did not find <sup>a</sup> it to be statistically significant difference, it is worth noting, that the  
20 lowest elevation soil (Vista, 210 m) showed a trend of aggregate stability increase up to 350 °C  
21 while the high elevation soils, Sirretta (2317 m) and Chiquito (2865 m), showed a slight increase  
22 in aggregate stability at 150 °C. Increase in hydrophobicity at these temperatures is the most  
23 likely cause, substantial hydrophobicity was apparent with Chiquito soils (2865 m) heated at  
24 250 °C where resistance to slaking was remarkably evident during aggregate stability test.

25 Soil specific surface area (SSA) is an important soil property that affects soil adsorption, ion  
26 exchange capacity, reactivity, aggregation and porosity (Feller et al., 1992). SSA of soil is  
27 largely dictated by clay-size particles and SOM (Carter et al., 1986). The increase in SSA with  
28 heating that we observed in this work is most likely the result of physical disintegration and  
29 charring of SOM, especially at temperatures below 500 °C. Changes in soil mineralogy are not  
30 likely to be responsible for the changes in SSA we observed. XRD analysis showed notable



1 mineralogical changes only at temperatures above 450 °C where the kaolinite peak disappeared  
2 at 550 °C and the phyllosilicate peaks were diminished or disappeared at 450 – 550 °C (e.g.  
3 Figure 6). Because of combustion and heat-induced dehydration, larger organic matter particles  
4 are likely to have fragmented and reduced in size with increase in heating temperature leading  
5 to increase in bulk soil SSA. Furthermore, removal of organic matter from mineral surfaces due  
6 to combustion may also increase surface area by reducing overall size of particles. At higher  
7 temperatures, XRD spectra showed some collapse of mineral complexes through dehydration  
8 and de-hydroxylation of clay minerals that may reduce mineral particle size and increase surface  
9 area. These changes in mineralogy might have a significant effect on SOM. A study by Rosa et  
10 al. (2013) found that soils released more organic compounds during pyrolysis when the soils  
11 were treated with HF acid, suggesting that mineral complexes play a role in protecting organic  
12 compounds from combustion. The collapse of mineral complexes we observed and the decrease  
13 in aggregate strength is likely to have enhanced thermal oxidation of SOM. However  
14 mineralogical changes would play a more important role affecting soil properties at these high  
15 temperatures since SOM has been almost completely removed.

16 Soil pH generally increases with fire heating (Ubeda and Outeiro, 2009; Badía and Martí,  
17 2003; Chandler et al., 1983). In a similar heating experiment as we followed in our study,  
18 Fernández et al. (1997) observed a pH increase of 1.7 at 350 °C and 2.35 at 490 °C, where the  
19 authors attributed the change in pH to denaturation of organic acids, the release of base cations  
20 from combustion (K- and Na-hydroxides, Mg- and Ca-carbonates), the deposition of ashes and  
21 loss of hydroxyl groups from clays (Certini, 2005; Badía and Martí, 2003). In our soils, the  
22 higher elevation soils (Shaver, Sirretta and Chiquito) showed a statistically insignificant  
23 decrease of 0.3 to 0.5 pH units (measured in water) at 250 °C. The change in pH in our high  
24 elevation soils was consistent to previous results of Badía and Martí (2003); Terefe et al. (2008)  
25 that found similar initial decrease. Terefe et al. (2008) hypothesized that this may be due to the  
26 combined effect of desiccation and heating effect which favor proton-reducing oxidation  
27 reactions. And the fact that this initial increase occurs below the temperature for start of  
28 combustion of organic acids means contribution of SOM to pH increase (organic acid  
29 denaturation and ash liming effect) was absent at this temperature. In a similar heating  
30 experiment Badía and Martí (2003) found an increase in electric conductivity and soluble Ca  
31 along with decrease in pH at 250 °C. Such increase in soluble cations might explain our findings



1 where we observed a decrease in pH when measured in water but not in  $\text{CaCl}_2$  suggesting that  
 2 the decrease in pH might have to do with increase of soluble salts with heating up to 250 °C.  
 3 The capacity of soil to exchange positively charged ions between soil and soil solution (CEC)  
 4 decreased with increasing temperature. CEC of soils is a result of surface charges associated  
 5 with secondary clay minerals and SOM (Sparks, 2005), and in our study soils, Dahlgren et al.  
 6 (1997) had previously reported a strong relationship of CEC with soil organic carbon and clay  
 7 concentrations. Different authors have attributed loss of CEC during heating mainly with loss  
 8 of SOM (Ubeda and Outeiro, 2009; Fernández et al., 1997) partly because CEC loss starts to be  
 9 observed at temperatures above 200 °C with little or no decrease at lower temperatures where  
 10 SOM is not affected (Soto and Diazfierros, 1993; Nishita and Haug, 1972). The slight increase  
 11 of CEC we observed at 350 °C may be due to the steep increase of specific surface area at that  
 12 temperature (Figure 4). The additional surface for cation adsorption might have to an extent  
 13 compensated for the loss of SOM at that temperature. Furthermore, the contribution of surface  
 14 oxidation of char products has been shown to increase CEC per unit C (Liang et al., 2006)  
 15 because of the almost complete loss of C at temperatures above 450 °C and very little loss at  
 16 temperatures below 250 °C. The soils most likely had highest concentration of charred SOM at  
 17 350 °C temperature.

#### 18 **4.1 Importance of the 250 – 450 °C range**

19 Based on maximum surface temperature, fires are often classified as low, medium or high  
 20 intensity. Low intensity fires reach surface temperatures of up to 250 °C, medium intensity fires  
 21 reach surface temperatures of 400 °C, and high intensity fires reach surface temperatures above  
 22 675 °C (Janzen and Tobin-Janzen, 2008). In this study, the most significant changes of soil  
 23 chemical properties occurred at the transition between low and medium severity fires, between  
 24 250 and 450 °C. Figure 10 illustrates the changes between unburned and 650 °C burned soils  
 25 and the amount of change that occurred within 250 to 450 °C heating temperature for a range  
 26 of the variables discussed above. In all cases, the change in the 250 – 450 °C range accounts for  
 27 most of the total change observed during our combustion treatments. Among the variables we  
 28 investigated in this study, we observed changes along two general lines: (1) mass loss, SSA and  
 29 pH which showed a progressive increase with heating temperature, and (2) %C, %N, C:N ratio,  
 30 CEC, and wet aggregate stability that showed a progressive decrease with combustion

If you're talking temperatures at the soil surface I would refer to differences in severity. Intensity is generally taken to have a specific meaning in fire science - the rate of heat output per m of fireline (kW/m)

What processes occur in this range that would explain this observation?





1 temperature (Figure 10), with the most significant changes in all cases being recorded in all  
 2 soils between 250 - 450°C.

3 Temperatures below 250 °C are very critical for many processes, water is lost at 95 °C and this  
 4 has a significant effect on soil heat conduction and soil biota (Janzen and Tobin-Janzen, 2008).  
 5 However, temperatures below 200 °C have very little effect on quality or quantity of SOM. This  
 6 means low intensity fires, such as typical prescribed fires, contribute little to soil C loss.  
 7 Similarly, temperatures above 500 °C do little change to SOM, which already has been lost or  
 8 transformed into a pyrogenic product. The effect on soil inorganic particles starts at high  
 9 temperature but the significance of change on minerals is not as large (Figure 1). Hence, we  
 10 found that the most important soil changes occur the 250 – 450 °C range.

I know what you mean but perhaps rephrase this as temperatures above 500 are also temperatures above 250

11 Important modifications of fire conditions that still allow for comparison of responses of  
 12 different types of soils have to be adopted to conduct the type of heating experiments that we  
 13 undertook in this work. A heating rate of 3 °C min<sup>-1</sup> is common in laboratory soil heating  
 14 studies, often because of technical consideration<sup>s</sup> and because such slow rate prevents sudden<sup>a</sup>  
 15 combustion which otherwise would happen as soil's ignition temperature is reached at about  
 16 220 °C (Fernández et al., 1997, 2001; Varela et al., 2010). However, it is important to recognize  
 17 that during vegetation fires the rate of temperature increase experienced by the topmost layer  
 18 of soil that is exposed to fire can be significantly higher. The rate of heating alone might have  
 19 additional significant effects on soil properties beyond what we observe here. For example,  
 20 Albalasmeh et al. (2013) found that slow rate of heating underestimates soil aggregate  
 21 destruction of moist soils due to a slower buildup of pore-pressure.

This is important and should be discussed earlier on and the methodological issues acknowledged in the Methods section. Duration of heating, the fact that the soils were dry and ground may also be important.

## 22 4.2 Climate Change Implications

23 Investigation of the response of climosequence soils to different heating temperature in this  
 24 study enables us to infer how changes in climate (and associated changes in soil properties) are  
 25 likely to alter the effect of fires on topsoil physical and chemical properties. Even though the  
 26 general pattern of change in soil physical and chemical conditions with increasing combustion  
 27 temperature were mostly consistent for all soils along our study climosequence, the actual  
 28 magnitude of change in the investigated variables was not. Hence, these finds<sup>ings</sup> lead us to  
 29 conclude that climate change is likely to alter the response of topsoil properties to different fire



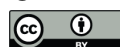

1 regimes. Along our study climosequence, we observed critical differences in response of  
2 topsoils based mostly on concentration OM in soil and soil development stages of each soil --  
3 both variables that are expected to respond to changes in climate (Berhe et al., 2012).  
4 Consequently, changes in soil C storage associated with climate change are expected to lead to  
5 different amounts of C loss due to fires. This is evidenced by the observed highest total mass of  
6 C loss from the mid-elevation Musick soil that had the highest carbon stock, compared to soils  
7 in either side of that elevation range. Anticipated changes in climate in the Sierra Nevada  
8 mountain ranges are expected to include upward movement of the rain-snow transition line  
9 exposing areas that now receive most of their precipitation as snow to rainfall and associated  
10 runoff. Moving of the rain-snow transition zone higher and promotion of more intense  
11 weathering at higher elevation zones then is likely to render more C to loss during fires. As we  
12 found in this study, more than 80% of the variability in mass loss, aggregate strength, SSA, pH,  
13 CEC and N concentrations is associated with changes in C concentration at the different  
14 combustion temperatures (Table 3). Improving our understanding of how topsoil properties are  
15 likely to respond to changes in climate becomes even more critical when we recognize that C  
16 concentration in soil is likely to respond quickly to changes in climate, compared to other soil  
17 physical and chemical properties (Berhe et al., 2012). Furthermore, the long-term fate of soil  
18 carbon in fire-affected ecosystems is also likely to be accompanied by changes in microbial  
19 community composition and OM decomposition kinetics (Holden et al., 2015; Tas et al., 2014)  
20 which are likely to have further implications for nutrient availability post-fire (Johnson et al.,  
21 2007b; Johnson et al., 1997).

22 The different responses of soil aggregation in our climosequence to the treatment temperatures  
23 also suggest potential loss and transformation of the physically protected C pool in topsoil.  
24 Degradation of aggregates during fire (Albalasmeh et al., 2013) is likely to render aggregate-  
25 protected C to potential losses through oxidative decomposition, leaching and erosion.  
26 Moreover, in systems such as the Sierra Nevada where steep slopes and organic matter-rich  
27 topsoils dominate, movement of the rain-snow transition zone upward is likely to increase  
28 proportion of precipitation that occurs as rain. The kinetic energy of raindrops and observed  
29 increase in hydrophobicity of soils post-fires (Johnson et al., 2007a; Johnson et al., 2004) can  
30 lead to higher rates of erosional redistribution of especially the free light fraction or particulate  
31 C that is not associated with soil minerals (Stacy et al., 2015). Moreover, the important



1 differences in changes in pH, mineralogy, CEC in response to heating at different temperatures  
 2 that we observed for soils along the climosequence suggest that changes in temperature are  
 3 likely to lead to different effects on soil chemical properties in soils after fires.

4 Finally, with changes in climate it is anticipated that fires will increase in severity (Westerling  
 5 et al., 2006b). Our findings of important changes in soil physical and chemical properties  
 6 occurring between 250-450°C are important for recognizing that critical transformations of  
 7 topsoil physical and chemical properties are likely to occur when, as a result of climate change,  
 8 systems that are adapted to low severity fires experience medium to high severity fires.

## 9 **5 Conclusion**

10 **The** Findings of this study showed that changes in soil properties during heating are closely related  
 11 to changes in C concentrations in soil. The temperatures most critical to C loss and alteration  
 12 were found to be 250 °C, where charring of organic matter starts and 450 °C where most of the  
 13 SOM is combusted. Most soil properties exhibited a steep change in this temperature range.  
 14 Soil aggregate stability, CEC, and C and N concentrations significantly decreased with  
 15 increased combustion temperature while soil pH and SSA significantly increased. The most  
 16 important effect of combustion on soil mineralogy as observed by XRD analysis was the  
 17 collapse of kaolinite, which was undetectable at temperatures above 500 °C.

18 This study presented the effects of heat input on topsoil properties. The study is necessary to  
 19 understand the changes that occur under fires that result in heating of soil without additional  
 20 variables such as the addition of charred plant material and ash, and the influence of soil  
 21 moisture. Findings from this study will contribute towards estimating the amount and rate of  
 22 change in carbon and nitrogen loss, and other essential soil properties that can be expected from  
 23 topsoil exposure to different intensity fires under anticipated climate change scenarios.

## 24 **Acknowledgements**

25 The authors would like to thank Prof. Randy A. Dahlgren for providing us with geo-references  
 26 for the study sites, background data, and for his comments on an earlier version of this  
 27 manuscript. We thank Drs. Marilyn Fogel and Christina Bradley for their help and expertise in  
 28 elemental analysis of C and N; and Dr. Samuel Traina for his comments on an earlier version

I think this is the strongest link you have to argue climate change implications. I'm not convinced about the climate series idea - soils are likely to change only slowly to climate change with very significant lag. The soils represent the results of underlying geological conditions and millenia of differing biological activity - surely that won't be erased overnight by climate change alone. What might happen is that alteration to disturbance regimes will alter vegetation and microbial communities and, in the process, alter soil properties and soil forming processes



1 of this manuscript. The research was funded by a UC Merced Graduate Research Council grant  
2 and NSF grant (EAR-1352627) to AAB.

### 3 **References**

- 4 Albalasmeh, A. A., Berli, M., Shafer, D. S., and Ghezzehei, T. A.: Degradation of moist soil  
5 aggregates by rapid temperature rise under low intensity fire, *Plant Soil*, 362, 335-344, DOI  
6 10.1007/s11104-012-1408-z, 2013.
- 7 Arcenegui, V., Mataix-Solera, J., Guerrero, C., Zomoza, R., Matalx-Beneyto, J., and Garcia-  
8 Orenes, F.: Immediate effects of wildfires on water repellency and aggregate stability in  
9 Mediterranean calcareous soils, *Catena*, 74, 219-226, DOI 10.1016/j.catena.2007.12.008, 2008.
- 10 Badía, D., and Martí, C.: Plant ash and heat intensity effects on chemical and physical properties  
11 of two contrasting soils, *Arid Land Research and Management*, 17, 23-41,  
12 10.1080/15324980301595, 2003.
- 13 Berhe, A. A., Suttle, K. B., Burton, S. D., and Banfield, J. F.: Contingency in the Direction and  
14 Mechanics of Soil Organic Matter Responses to Increased Rainfall, *Plant Soil*, 358, 371-383.  
15 DOI 10.1007/s11104-11012-11156-11100, 2012.
- 16 Bowman, D. M. J. S., Balch, J. K., Artaxo, P., Bond, W. J., Carlson, J. M., Cochrane, M. A.,  
17 D'Antonio, C. M., DeFries, R. S., Doyle, J. C., Harrison, S. P., Johnston, F. H., Keeley, J. E.,  
18 Krawchuk, M. A., Kull, C. A., Marston, J. B., Moritz, M. A., Prentice, I. C., Roos, C. I., Scott,  
19 A. C., Swetnam, T. W., van der Werf, G. R., and Pyne, S. J.: Fire in the Earth System, *Science*,  
20 324, 481-484, 10.1126/science.1163886, 2009.
- 21 Caldararo, N.: Human ecological intervention and the role of forest fires in human ecology, *The*  
22 *Science of the total environment*, 292, 141-165, 2002.

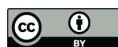

- 1 Carroll, E. M., Miller, W. W., Johnson, D. W., Saito, L., Qualls, R. G., and Walker, R. F.:
- 2 Spatial analysis of a large magnitude erosion event following a Sierran wildfire, *J Environ Qual*,
- 3 36, 1105-1111, 10.2134/jeq2006.0466, 2007.
- 4 Carter, D. L., Mortland, M. M., and Kemper, W. D.: Specific surface area, in: *Methods of Soil*
- 5 *Analysis. Part 1, Physical and Mineralogical Methods*, 2 ed., edited by: Klute, A., Agronomy,
- 6 No.9, Part 1, American Society of Agronomy/ Soil Science Society, Madison, 1986.
- 7 Certini, G.: Effects of fire on properties of forest soils: a review, *Oecologia*, 143, 1-10,
- 8 10.1007/s00442-004-1788-8, 2005.
- 9 Chandler, C., Cheney, P., thomas, P., Trabaud, L., and William, D.: Fire effects on soil, water
- 10 and air, in: *Fire in Forestry. Vol I: Forest fire behaviour and effects*, John Wiley Sons, New
- 11 York, 1983.
- 12 Dahlgren, R. A., Boettinger, J. L., Huntington, G. L., and Amundson, R. G.: Soil development
- 13 along an elevational transect in the western Sierra Nevada, California, *Geoderma*, 78, 207-236,
- 14 Doi 10.1016/S0016-7061(97)00034-7, 1997.
- 15 DeBano, L. F., Dunn, P. H., and Conrad, C. E.: Fire's effect on physical and chemical properties
- 16 of Chaparral soils, 1977.
- 17 DeBano, L. F.: The effect of fire on soil properties, *Symposium on Management and*
- 18 *Productivity of Westero-Montane Forest Soils*,., Ogden, UT, 1991, 151-156,
- 19 DeBano, L. F., Neary, D. G., and Ffolliott, P. F.: *Fire's effect on ecosystems* John Wiley &
- 20 Sons, Inc., New York, USA, 1998.
- 21 DeBano, L. F.: The role of fire and soil heating on water repellency in wildland environments
- 22 a review, *Journal of Hydrology*, 195-206, 2000.



- 1 Diaz-Ravina, M., Prieto, A., Acea, M. J., and Carballas, T.: Fumigation extraction method to  
2 estimate microbial biomass in Heated Soils, *Soil Biol Biochem*, 24, 259-264, Doi  
3 10.1016/0038-0717(92)90227-O, 1992.
- 4 FAO: State of the world's forest Food and Agricultural Organization of the United Nations,  
5 Rome, Italy, 2005.
- 6 Feller, C., Schouller, E., Thomas, F., Rouiller, J., and Herbillon, A. J.: N<sub>2</sub>-BET Specific surface  
7 areas of some low activity clay soils and their relationships with secondary constituents and  
8 organic matter contents, *Soil Science*, 153, 1992.
- 9 Fernández, I., Cabaneiro, A., and Carballas, T.: Organic matter changes immediately after a  
10 wildfire in an Atlantic forest soil and comparison with laboratory soil heating, *Soil Biology and*  
11 *Biochemistry*, 29, 1-11, Doi 10.1016/S0038-0717(96)00289-1, 1997.
- 12 Fernández, I., Cabaneiro, A., and Carballas, T.: Thermal resistance to high temperatures of  
13 different organic fractions from soils under pine forests, *Geoderma*, 104, 281-298,  
14 [http://dx.doi.org/10.1016/S0016-7061\(01\)00086-6](http://dx.doi.org/10.1016/S0016-7061(01)00086-6), 2001.
- 15 Giovannini, G., Lucchesi, S., and Giachetti, M.: Effect of heating on some physical and  
16 chemical parameters related to soil aggregation and erodibility, *Soil Science*, 146, 1988.
- 17 Giovannini, G.: The effect of fire on soil quality, in: *Soil Erosion and Degradation as a*  
18 *Consequence of Forest Fires*, edited by: Sala, M., and Rubio, J. L., Geoforma Ediciones,  
19 Logrono, 15-28, 1994.
- 20 González-Pérez, J., González-Vila, F., Almendros, G., and Knicker, H.: The effect of fire on  
21 soil organic matter—a review, *Environment international*, 30, 855-870,  
22 10.1016/j.envint.2004.02.003, 2004.

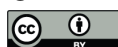

- 1 Harradine, F., and Jenny, H.: Influence of parent material and climate on texture and nitrogen  
2 and carbon contents of virgin California soils: texture and nitrogen contents of soils, *Soil*  
3 *Science*, 85, 235-243, 1958.
- 4 Harrison, S. P., Marlon, J. R., and Bartlein, P. J.: Fire in the Earth System, *Int Year Planet Earth*,  
5 21-48, Doi 10.1007/978-90-481-8716-4\_3, 2010.
- 6 Holden, S. R., Berhe, A. A., and Treseder, K. K.: Decreases in soil moisture and organic matter  
7 quality suppress microbial decomposition following a boreal forest fire, *Soil Biology and*  
8 *Biochemistry*, 87, 1-9, 2015.
- 9 Huntington, G. L.: The effect of vertical zonality on clay content in residual granitic soils of the  
10 Sierra Nevada mountains, University of California, Berkeley, 1954.
- 11 Janzen, C., and Tobin-Janzen, T.: Microbial communities in fire-affected soils, in:  
12 *Microbiology of Extreme Soils*, edited by: Dion, P., and Nautiyal, C. S., *Soil Biology*, 13,  
13 Springer-Verlag Berlin Heidelberg, 299-316, 2008.
- 14 Jenny, H., Gessel, S. P., and Bingham, F. T.: Comparative study of decomposition rates of  
15 organic matter in temperate and tropical regions, *Soil Science*, 68, 419-432, 1949.
- 16 Johnson, D., Susfalk, R., and Dahlgren, R.: Nutrient fluxes in forests of the eastern Sierra  
17 Nevada mountains, United States of America, *Global Biogeochemical Cycles*, 11, 673-681,  
18 1997.
- 19 Johnson, D., Murphy, J., Walker, R., Glass, D., and MILLER, W.: Wildfire effects on forest  
20 carbon and nutrient budgets, *Ecological Engineering*, 31, 183-192, 2007a.
- 21 Johnson, D., Murphy, J. D., Walker, R. F., Glass, D. W., and Miller, W. W.: Wildfire effects  
22 on forest carbon and nutrient budgets, *Ecological Engineering*, 31, 183-192, 2007b.



- 1 Johnson, D. W., Susfalk, R. B., Caldwell, T. G., Murphy, J. D., Miller, W. W., and Walker, R.
- 2 F.: Fire Effects on Carbon and Nitrogen Budgets in Forests, Water, Air, & Soil Pollution:
- 3 Focus, 4, 263-275, 10.1023/B:WAFO.0000028359.17442.d1, 2004.
- 4 Ketterings, Q. M., and Bigham, J. M.: Soil color as an indicator of slash-and-burn fire severity
- 5 and soil fertility in Sumatra, Indonesia, Soil Sci Soc Am J, 64, 1826-1833, 2000.
- 6 Knicker, H.: How does fire affect the nature and stability of soil organic nitrogen and carbon?
- 7 A review, Biogeochemistry, 85, 91-118, DOI 10.1007/s10533-007-9104-4, 2007.
- 8 Liang, B., Lehmann, J., Solomon, D., Kinyangi, J., Grossman, J., O'Neill, B., Skjemstad, J. O.,
- 9 Thies, J., Luizao, F. J., Petersen, J., and Neves, E. G.: Black carbon increases cation exchange
- 10 capacity in soils, Soil Sci Soc Am J, 70, 1719-1730, 2006.
- 11 Massman, W. J., Frank, J. M., and Mooney, S. J.: Advancing investigation and physical
- 12 modeling of first-order fire effects on soils, Fire Ecology, 6, 36-54,
- 13 10.4996/fireecology.0601036, 2010.
- 14 Mataix-Solera, J., Cerda, A., Arcenegui, V., Jordan, A., and Zavala, L. M.: Fire effects on soil
- 15 aggregation: a review, Earth-Sci Rev, 109, 44-60, DOI 10.1016/j.earscirev.2011.08.002, 2011.
- 16 McKelvey, K. S., Skinner, C. N., Chang, C.-r., Erman, D. C., Husari, S. J., Parsons, D. J.,
- 17 Wagtendonk, J. W. v., and Weatherspoon, C. P.: An overview of fire in the Sierra Nevada,
- 18 Davis, California37, 1996.
- 19 National Report of Wildland Fires and Acres Burned by State:
- 20 [https://www.nifc.gov/fireInfo/fireInfo\\_statistics.html](https://www.nifc.gov/fireInfo/fireInfo_statistics.html), access: 6/5/2015, 2015.
- 21 Neary, D. G., Klopatek, C. C., DeBano, L. F., and Ffolliott, P. F.: Fire effects on belowground
- 22 sustainability a review and synthesis, Forest Ecology and Management, 122, 51-71, 1999.



- 1 Nimmo, J. R., and Perkins, K. S.: Aggregate stability and size distribution, in: Methods of Soil
- 2 Analysis. Part 4, Physical Methods, edited by: Dane, J. H., and Topp, G. C., Soil Science Society
- 3 of America, Madison, Wisconsin, 317-328, 2002.
- 4 Nishita, H., and Haug, R. M.: Some physical and chemical characteristics of heated soils, Soil
- 5 Science, 113, 422-430, 1972.
- 6 Parsons, D. J., and van Wagtenonk, J. W.: Fire research and management in the Sierra Nevada
- 7 National Parks in: Science and Ecosystem Management in the National Parks, edited by:
- 8 Halvorson, W. L., and Davis, G. E., The University of Arizona Press, 25-48, 1996.
- 9 Pechony, O., and Shindell, D. T.: Driving forces of global wildfires over the past millennium
- 10 and the forthcoming century, Proceedings of the National Academy of Sciences,
- 11 10.1073/pnas.1003669107, 2010.
- 12 Rasmussen, C., Matsuyama, N., Dahlgren, R. A., Southard, R. J., and Brauer, N.: Soil Genesis
- 13 and Mineral Transformation Across an Environmental Gradient on Andesitic Lahar, Soil Sci
- 14 Soc Am J, 71, 225-237, doi:10.2136/sssaj2006.0100, 2007.
- 15 Rein, G., Cleaver, N., Ashton, C., Pironi, P., and Torero, J. L.: The severity of smouldering peat
- 16 fires and damage to the forest soil, Catena, 74, 304-309, DOI 10.1016/j.catena.2008.05.008,
- 17 2008.
- 18 Rible, J. M., and Quick, J.: Method S-19.0: Cation Exchange Capacity, in: Water, Soil, Plant
- 19 Tissue: Tentative Methods of Analysis for Diagnostic Purposes, University of California
- 20 Agricultural Experiment Service, Davis, CA, , 1960.
- 21 Rietveld, H. M.: A Profile Refinement Method for Nuclear and Magnetic Structures, J Appl
- 22 Crystallogr, 2, 65-71, Doi 10.1107/S0021889869006558, 1969.





- 1 Rosa, J. M. D. I., Gonzalez-Perez, J. A., Gonzalez-Vila, F. J., and Knicker, H.: Medium term
- 2 effects of fire induced soil organic matter alterations on Andosols under Canarian pine (*Pinus*
- 3 *canariensis*), Journal of Analytical and Applied Pyrolysis, 104, 269-279, 2013.
- 4 Rossel, R. A. V., Minasny, B., Roudier, P., and McBratney, A. B.: Colour space models for soil
- 5 science, Geoderma, 133, 320-337, DOI 10.1016/j.geoderma.2005.07.017, 2006.
- 6 Schulze, D. G., and Dixon, J. B.: An introduction to soil mineralogy, in: Soil mineralogy with
- 7 environmental applications, edited by: Schulze, D. G., and Dixon, J. B., Soil Science Society
- 8 of America, Inc. , Madison, Wisconsin, USA, 1-35, 2002.
- 9 Soto, B., Benito, E., Basanta, R., and Díaz-Fierros, F.: Influence of antecedent soil moisture on
- 10 pedological effects of fire, in: Soil Erosion and Degradation as a Consequence of Forest Fires,
- 11 edited by: Sala, M., and Rubio, J. L., Geoforma Ed., Logroño, Spain, 1991.
- 12 Soto, B., and Diazfierros, F.: Interactions between plant ash leachates and soil, Int J Wildland
- 13 Fire, 3, 207-216, Doi 10.1071/Wf9930207, 1993.
- 14 Sparks, D. L.: Environmental Soil Chemistry, edited by: Press, E. A., The Netherlands, 2005.
- 15 Stacy, E., Hart, S. C., Hunsaker, C. T., Johnson, D. W., and Berhe, A. A.: Soil carbon and
- 16 nitrogen erosion in forested catchments: implications for erosion-induced terrestrial carbon
- 17 sequestration, Biogeosciences, 12, 4861-4874, 10.5194/bgd-12-2491-2015, 2015.
- 18 Stoof, C. R., Wesseling, J. G., and Ritsema, C. J.: Effects of fire and ash on soil water retention,
- 19 Geoderma, 159, 276-285, 10.1016/j.geoderma.2010.08.002, 2010.
- 20 Tas, N., Prestat, E., McFarland, J. W., Wickland, K. P., Knight, R., Berhe, A. A., Jorgenson, T.,
- 21 Waldrop, M. P., and Jansson, J. K.: Impact of fire on active layer and permafrost microbial



- 1 communities and metagenomes in an upland Alaskan boreal forest, *The ISME Journal.*, 1-16,  
2 2014.
- 3 Terefe, T., Mariscal-Sancho, I., Peregrina, F., and Espejo, R.: Influence of heating on various  
4 properties of six Mediterranean soils: a laboratory study, *Geoderma*, 143, 273-280,  
5 10.1016/j.geoderma.2007.11.018, 2008.
- 6 Thomas, G. W.: Soil pH and soil acidity, in: *Methods of Soil Analysis. Part 3, Chemical*  
7 *Methods*, edited by: Sparks, D. L., Page, A. L., Helmke, P. A., and Loeppert, R. H., Soil Science  
8 Society of America/ American Society of Agronomy, Madison, Wisconsin, 1996.
- 9 Trumbore, S., Chadwick, O., and Amundson, R.: Rapid exchange between soil carbon and  
10 atmospheric carbon dioxide driven by temperature change, *Science*, 272, 393-396, 1996.
- 11 Ubeda, X., and Outeiro, L. R.: Physical and Chemical Effects of Fire on Soil, in: *Fire Effects*  
12 *on Soils and Restoration Strategies*, edited by: Cerda, A., and Robichaud, P. R., Land  
13 Reconstruction and Management, Science Publishers, Enfield, NH, USA, 2009.
- 14 Convert Munsell colors to computer-friendly RGB triplets:  
15 [http://casoilresource.lawr.ucdavis.edu/software/r-advanced-statistical-package/color-](http://casoilresource.lawr.ucdavis.edu/software/r-advanced-statistical-package/color-functions/convert-munsell-colors-computer-friendly-rgb-triplets/)  
16 [functions/convert-munsell-colors-computer-friendly-rgb-triplets/](http://casoilresource.lawr.ucdavis.edu/software/r-advanced-statistical-package/color-functions/convert-munsell-colors-computer-friendly-rgb-triplets/).
- 17 Ulery, A. L., and Graham, R. C.: Forest-fire effects on soil color and texture, *Soil Sci Soc Am*  
18 *J.*, 57, 135-140, 1993.
- 19 van Wagtenonk, J. W., and Fites-Kaufman, J. A.: Sierra Nevada Bioregion, in: *Fire in*  
20 *California's Ecosystems*, edited by: Sugihara, N. G., van Wagtenonk, J. W., Shaffer, K. E., and  
21 Thode, A. E., University of California Press, Berkeley, CA, USA, 2006.



- 1 Varela, M. E., Benito, E., and Keizer, J. J.: Effects of wildfire and laboratory heating on soil  
2 aggregate stability of pine forests in Galicia: the role of lithology, soil organic matter content  
3 and water repellency, *Catena*, 83, 127-134, 10.1016/j.catena.2010.08.001, 2010.
- 4 Westerling, A. L., Hidalgo, H. G., Cayan, D. R., and Swetnam, T. W.: Warming and earlier  
5 spring increase western U.S. forest wildfire activity, *Science*, 313, 940-943,  
6 10.1126/science.1128834, 2006a.
- 7 Westerling, A. L., Hidalgo, H. G., Cayan, D. R., and Swetnam, T. W.: Warming and earlier  
8 spring increase western US forest wildfire activity, *Science*, 313, 940-943, 2006b.
- 9 Zavala, L. M., Granged, A. J. P., Jordán, A., and Bárcenas-Moreno, G.: Effect of burning  
10 temperature on water repellency and aggregate stability in forest soils under laboratory  
11 conditions, *Geoderma*, 158, 366-374, 10.1016/j.geoderma.2010.06.004, 2010.

12



## 1 Tables

2 Table 1 Soil classification and site description for the five sites along elevational transect in the western slopes of  
 3 the Sierra Nevada (adapted from Dahlgren et al., 1997)

| Soil Series           | Elevation (m) | Ecosystem                      | MAT <sup>a</sup> (°C) | MAP <sup>b</sup> (cm) | Precip <sup>c</sup> | Dominant vegetation (listed in order of dominance)                                                             | Soil taxonomy (family)                                        |
|-----------------------|---------------|--------------------------------|-----------------------|-----------------------|---------------------|----------------------------------------------------------------------------------------------------------------|---------------------------------------------------------------|
| Vista                 | 210           | Oak woodland                   | 16.7                  | 33                    | Rain                | Annual grasses; <i>Quercus douglasii</i> ; <i>Quercus wislizeni</i>                                            | Coarse-loamy, mixed, superactive, thermic; Typic Haploxerepts |
| Musick                | 1384          | Oak/mixed-conifer forest       | 11.1                  | 91                    | Rain                | <i>Pinus ponderosa</i> ; <i>Calocedrus decurrens</i> ; <i>Quercus kelloggii</i> ; <i>Chamaebatia foliolosa</i> | Fine-loamy, mixed, semiactive, mesic                          |
| Shaver                | 1737          | Mixed-conifer forest           | 9.1                   | 101                   | Snow                | <i>Abies concolor</i> ; <i>Pinus lambertiana</i> ; <i>Pinus ponderosa</i> ; <i>Calocedrus decurrens</i>        | Coarse-loamy, mixed, superactive, mesic; Humic Dystroxerepts  |
| Sirretta              | 2317          | Mixed-conifer forest           | 7.2                   | 108                   | Snow                | <i>Pinus jeffreyi</i> ; <i>Abies magnifica</i> ; <i>Abies concolor</i>                                         | Sandy-skeletal, mixed, frigid; Dystric Xerorthent             |
| Chiquito <sup>d</sup> | 2865          | Subalpine mixed-conifer forest | 3.9                   | 127                   | Snow                | <i>Pinus contorta murrayana</i> ; <i>Pinus monticola</i> ; <i>Lupinus</i> species                              | Sandy-skeletal, mixed; Entic Cryumbrept                       |

4 <sup>a</sup> Mean annual air temperature, calculated from regression equation of Harradine and Jenny (1958)

5 <sup>b</sup> Mean annual precipitation

6 <sup>c</sup> Dominant form of precipitation

7 <sup>d</sup> Tentative soil series

8



1

2 Table 2 Bulk density, water content, pH, C concentration, cation exchange capacity (CEC), specific surface area  
 3 (SSA) and particle size distribution for the five soils (mean  $\pm$  standard error, n=3)

| Soil series and<br>elevation (m) | Bulk<br>density<br>(g/cm <sup>3</sup> ) | Gravimet<br>ric water<br>content<br>(%) | pH<br>(CaCl <sub>2</sub> ) | Carbon<br>(%)  | CEC<br>(cmol <sub>e</sub> /kg) | SSA (m <sup>2</sup> /g) | Particle size<br>distribution <sup>a</sup> (%) |      |      |
|----------------------------------|-----------------------------------------|-----------------------------------------|----------------------------|----------------|--------------------------------|-------------------------|------------------------------------------------|------|------|
|                                  |                                         |                                         |                            |                |                                |                         | Sand                                           | Silt | Clay |
| Vista (210)                      | 1.26 $\pm$ 0.07                         | 0.7 $\pm$ 0.0                           | 5.53 $\pm$ 0.0             | 1.51 $\pm$ 0.2 | 8.40 $\pm$ 1.1                 | 1.75 $\pm$ 0.2          | 79                                             | 11   | 10   |
| Musick (1384)                    | 0.90 $\pm$ 0.06                         | 9.3 $\pm$ 1.6                           | 4.67 $\pm$ 0.1             | 7.66 $\pm$ 0.8 | 25.20 $\pm$ 2.0                | 4.98 $\pm$ 0.3          | 60                                             | 27   | 15   |
| Shaver (1737)                    | 0.98 $\pm$ 0.06                         | 8.3 $\pm$ 1.1                           | 4.85 $\pm$ 0.3             | 2.84 $\pm$ 0.2 | 10.67 $\pm$ 2.1                | 3.08 $\pm$ 0.3          | 80                                             | 15   | 5    |
| Sirretta (2317)                  | 0.61 $\pm$ 0.09                         | 9.9 $\pm$ 2.2                           | 4.54 $\pm$ 0.1             | 4.74 $\pm$ 0.8 | 12.23 $\pm$ 2.6                | 6.63 $\pm$ 0.8          | 80                                             | 15   | 5    |
| Chiquito (2865)                  | 1.17 $\pm$ 0.03                         | 6.1 $\pm$ 1.9                           | 3.96 $\pm$ 0.1             | 4.10 $\pm$ 0.2 | 6.03 $\pm$ 1.8                 | 1.00 $\pm$ 0.04         | 80                                             | 16   | 4    |

4 <sup>a</sup> Particle size distribution of top soil profile from Dahlgren et al. (1997): Vista (0 – 14 cm),  
 5 Musick (0 – 29 cm), Shaver (0 – 4 cm), Sirretta (0 – 6 cm) and Chiquito (0 – 6 cm)

6

7

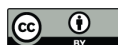

1

2 Table 3 Linear correlation coefficients of changes in soil properties with changes in C concentration

| Soil     | Correlation coefficient ( $r^2$ ) values |      |                     |                         |      |                 |
|----------|------------------------------------------|------|---------------------|-------------------------|------|-----------------|
|          | Mass loss                                | SSA  | Aggregate Stability | pH (CaCl <sub>2</sub> ) | CEC  | N concentration |
| Vista    | 0.74                                     | 0.73 | 0.21                | 0.77                    | 0.78 | 0.89            |
| Musick   | 0.89                                     | 0.58 | 0.77                | 0.89                    | 0.96 | 0.83            |
| Shaver   | 0.82                                     | 0.58 | 0.68                | 0.74                    | 0.78 | 0.93            |
| Sirretta | 0.60                                     | 0.34 | 0.47                | 0.67                    | 0.87 | 0.86            |
| Chiquito | 0.82                                     | 0.62 | 0.78                | 0.88                    | 0.44 | 0.87            |

3

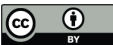

1 **Figures**

2

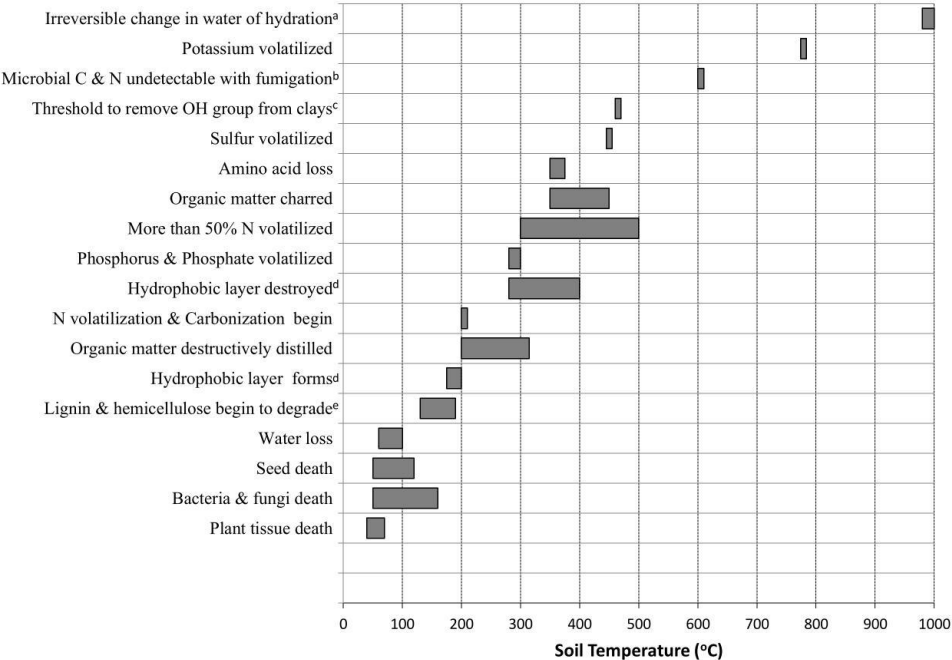

3

4 Figure 1: Temperature thresholds and ranges associated with fire heating. Figure adopted and  
5 expanded from Massman et al. (2010). (<sup>a</sup> DeBano et al. (1977), <sup>b</sup> Diaz-Ravina et al. (1992), <sup>c</sup>  
6 Giovannini et al. (1988), <sup>d</sup> DeBano (2000), and <sup>e</sup> Knicker (2007))

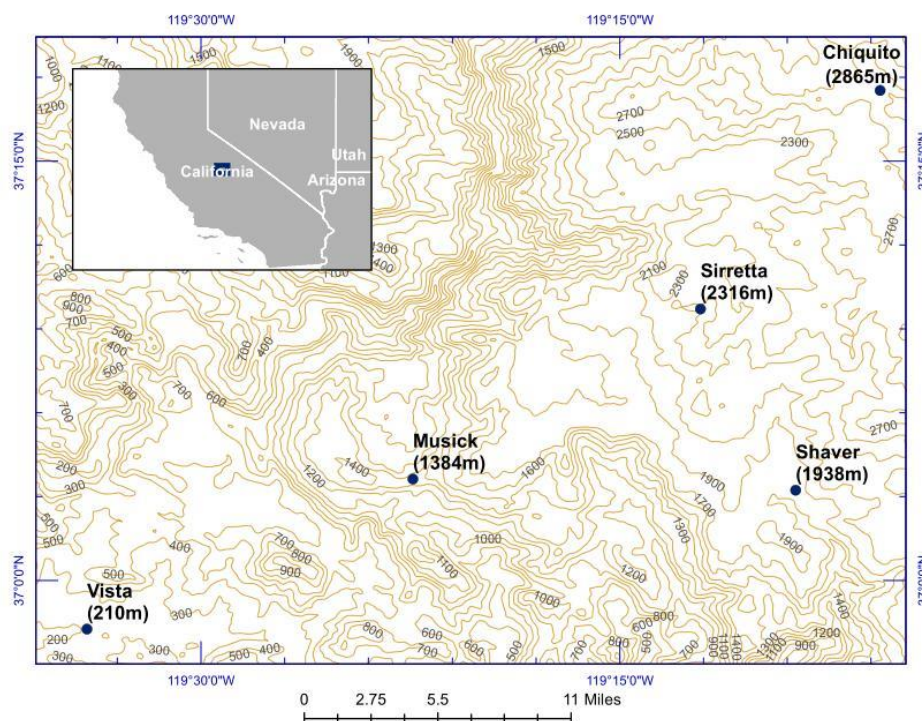

1  
 2 Figure 2: Map of the five sampling sites along elevational transect in the Western Sierra Nevada,  
 3 California (Base map from U.S. Geological Survey, 2015)



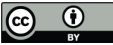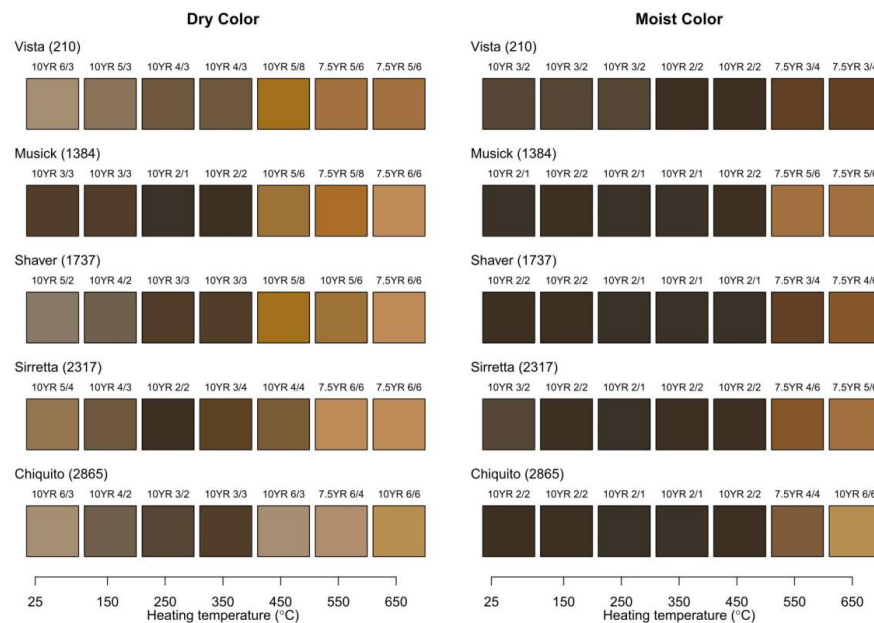

1  
 2 Figure 3: Soil color change across heating temperatures. Colors produced from CIExyY  
 3 colorspace equivalents to Munsell colors (Munsell Color Science Laboratory). CIExyY colors  
 4 were converted to RGB system (Rossel et al., 2006;UC Davis Soil Resource Laboratory) and  
 5 visually compared with Munsell Soil Color book for plotting.

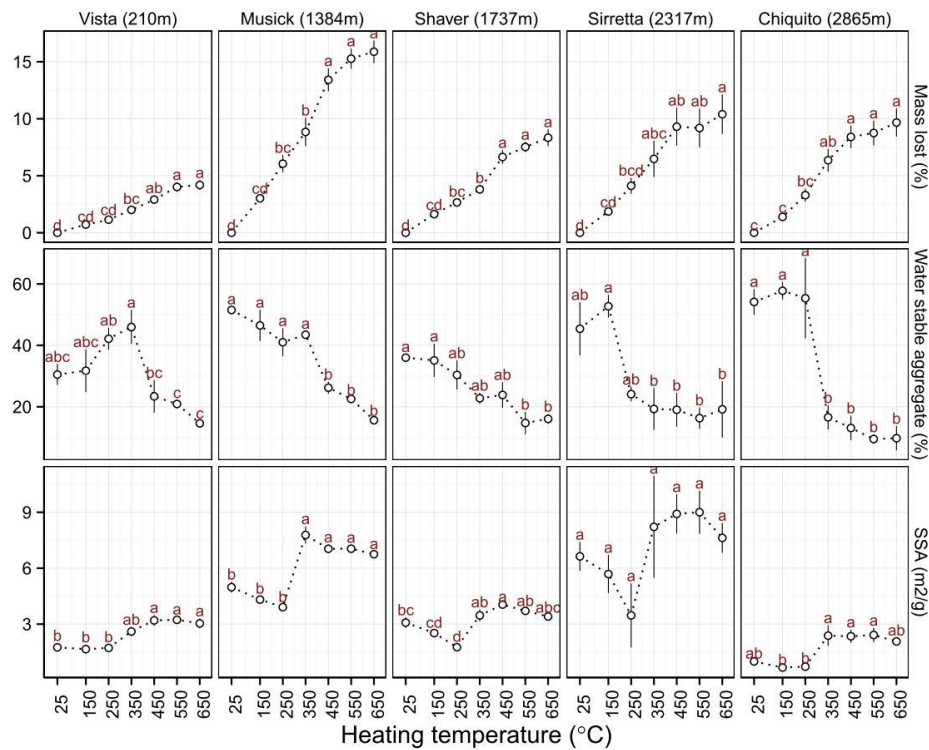

1  
 2 Figure 4: Percent mass lost, water-stable aggregate percent and specific surface area changes  
 3 with increase in heating temperatures. Error bars represent standard error where n=3. Different  
 4 letters represent significantly different means ( $p<0.05$ ) at temperature after Tukey's HSD  
 5 testing.

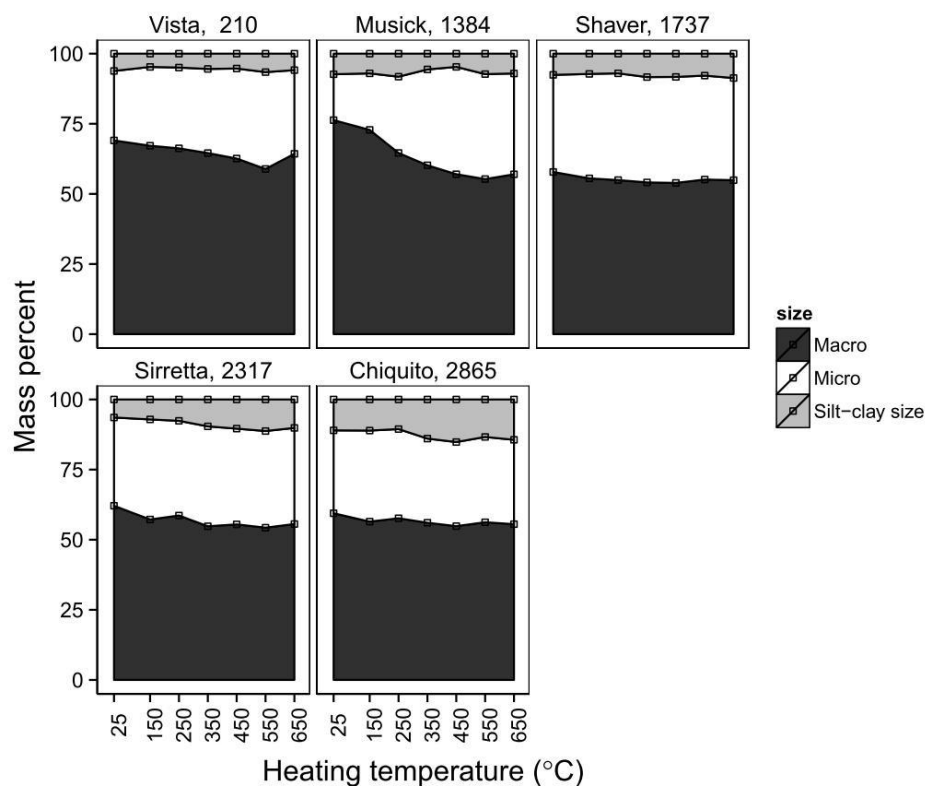

1

2 Figure 5: Weight fraction of aggregate sizes: macro (2-0.25 mm), micro (0.25-0.053 mm) and  
 3 silt-clay (<0.053 mm) sizes.

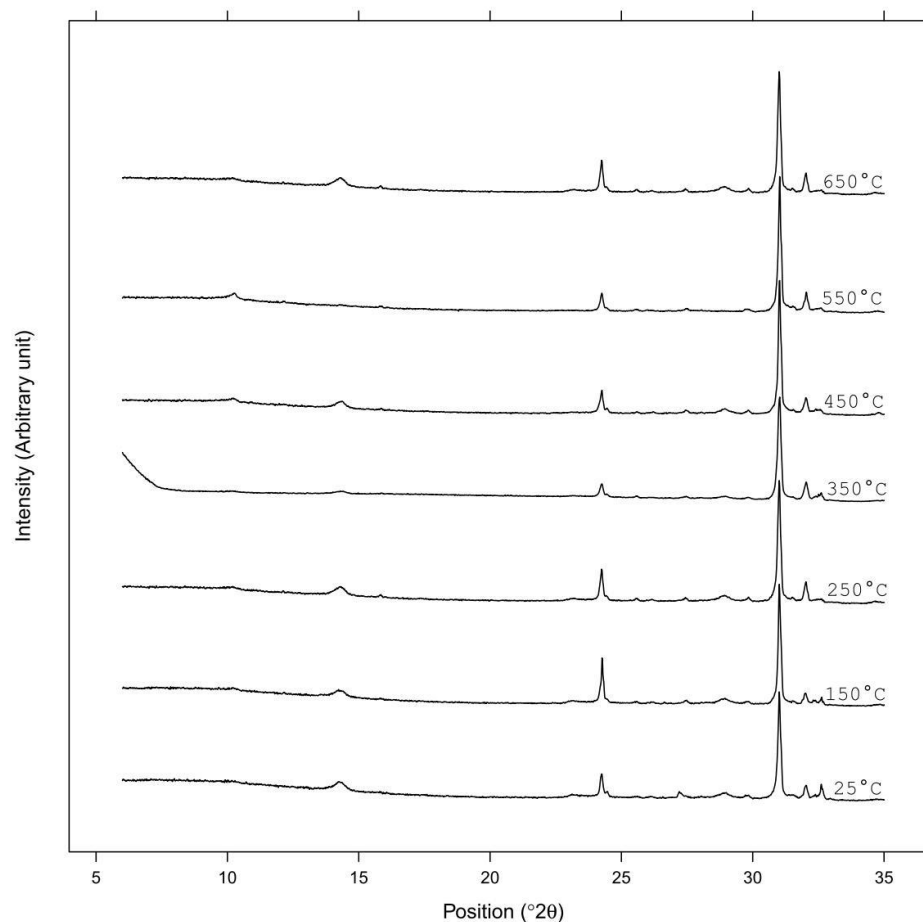

Perhaps highlight areas of the figure where you believe you're seeing important/interesting changes in peaks?

- 1
- 2 Figure 6: XRD diagram for Music series soils.

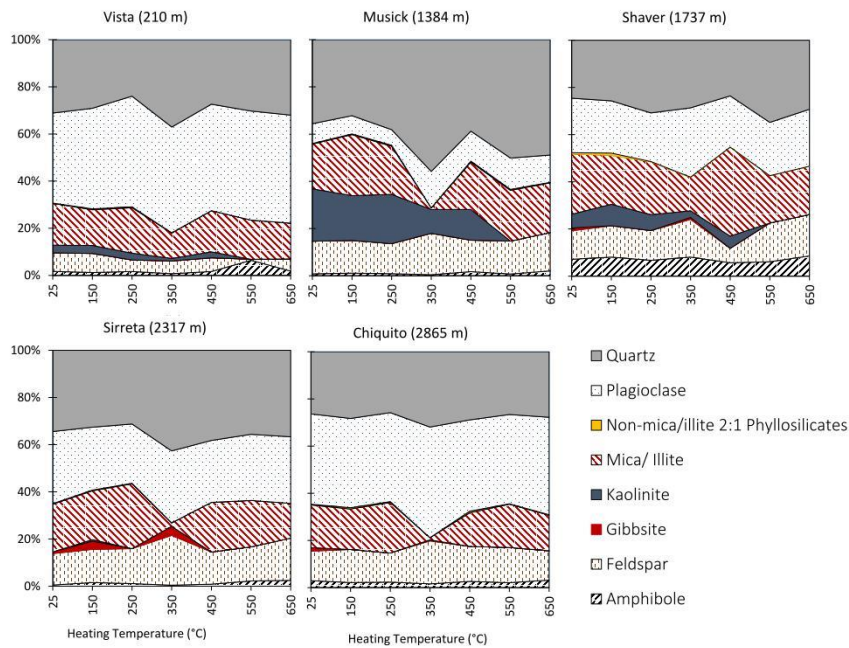

1  
2 Figure 7: Relative amounts of minerals identified from powder XRD.

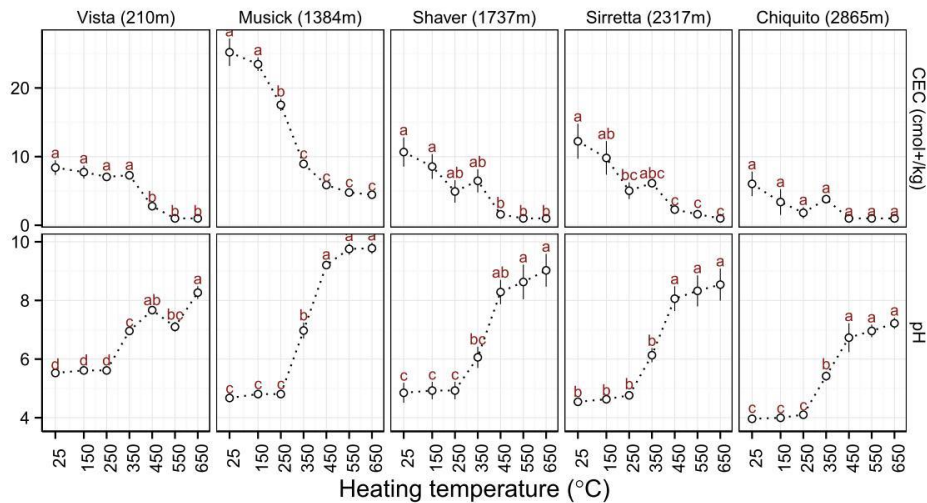

4

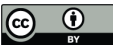

1 Figure 8: pH (geometric means) and cation exchange capacity (adjusted for mass loss) changes  
 2 with increase in heating temperature. CEC values below the 2 cmol/kg are assigned a value of  
 3 1 for plotting. Error bars represent standard error where n=3. Different letters represent  
 4 significantly different means ( $p < 0.05$ ) at each temperature after Tukey's HSD testing.

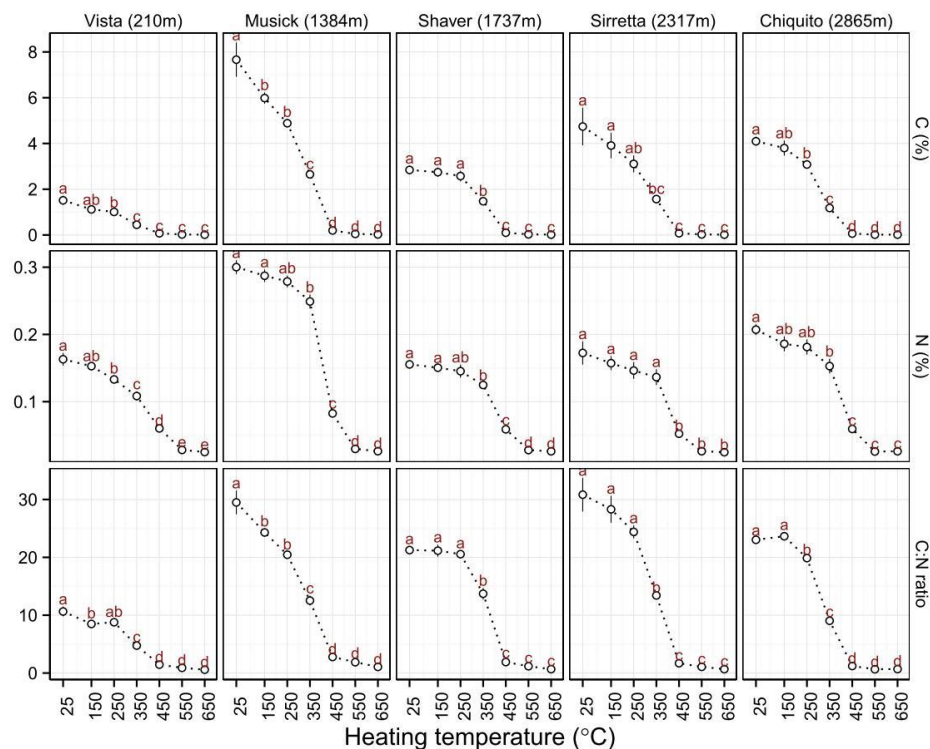

5  
 6 Figure 9: Carbon concentration, Nitrogen concentration and C:N atomic ratio changes with  
 7 increase in heating temperature. Error bars represent standard error where n=3. Different letters  
 8 represent significantly different means ( $p < 0.05$ ) at each temperature after Tukey's HSD testing.

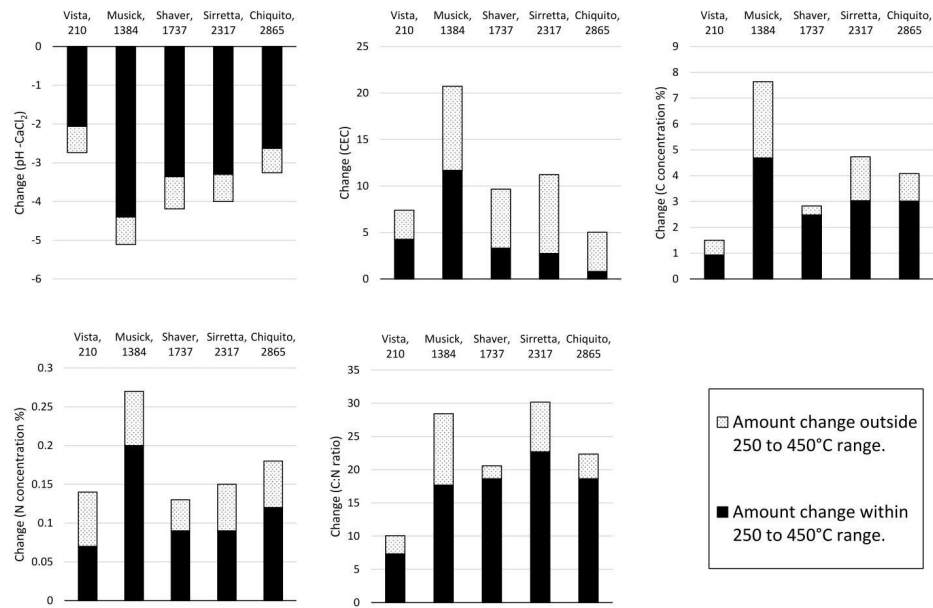

1  
 2 Figure 10: Total amount of change from unburned to 650 °C combusted soils showing amount  
 3 of change within the 250 to 450 °C range.
